## RESEARCH ARTICLE

# Measuring social norms related to child marriage among married women and men in Niger

Pooja Sripad<sup>1</sup>, Jessie Pinchoff<sup>1</sup>, Chaibou Dadi<sup>2</sup>, Leanne Dougherty<sup>1\*</sup><sup>1</sup> Population Council, Washington, DC, United States of America, <sup>2</sup> Conception Etudes Suivi Evaluation Appuis Formation, Niamey, Niger\* [leanne\\_dougherty@hotmail.com](mailto:leanne_dougherty@hotmail.com)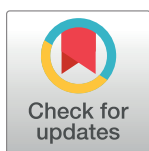

## Abstract

### Background

Child marriage remains prevalent in the Sahel region. Pervasive norms regarding child marriage, and sexual behavior persist. We explored norms from multiple perspectives to strengthen interventions aimed at delaying age at marriage.

### Methods

This study analyzed a cross-sectional household survey conducted in Niger in 2022 with women aged 15–49 ( $n = 2,726$ ) and a subset of their male household members aged 15–59 ( $n = 1,136$ ). Separate logistic regression models assessed factors associated with three descriptive (e.g., perception of what others do) and injunctive (e.g., perception of a group's approval or disapproval) normative outcomes related to practices that support marriage as soon as a girl reaches puberty and beliefs related to premarital sex.

### Results

Our study found a greater proportion of men described early marriage as protective from the fear of socially induced ruined marital prospects for women (70% vs. 64%), while women expressed its protection from being harassed (62% compared to 42%). The injunctive norm outcome that “my neighbors think that one should marry off one's daughter as soon as she reaches puberty” was significantly associated with the belief that child marriage was protective for females among women (OR = 4.49; 95% CI 3.13–5.50) and men (OR = 8.21; 95% CI 5.88, 11.45).

### Conclusions

Programs addressing child marriage should consider both male and female perspectives to address differences and foster an environment where communities and families shift norms to delay early marriage.

## OPEN ACCESS

**Citation:** Sripad P, Pinchoff J, Dadi C, Dougherty L (2024) Measuring social norms related to child marriage among married women and men in Niger. PLoS ONE 19(7): e0307595. <https://doi.org/10.1371/journal.pone.0307595>

**Editor:** José Antonio Ortega, University of Salamanca, SPAIN

**Received:** February 21, 2024

**Accepted:** June 28, 2024

**Published:** July 26, 2024

**Copyright:** © 2024 Sripad et al. This is an open access article distributed under the terms of the [Creative Commons Attribution License](https://creativecommons.org/licenses/by/4.0/), which permits unrestricted use, distribution, and reproduction in any medium, provided the original author and source are credited.

**Data Availability Statement:** Data are available through the Harvard Dataverse: <https://dataverse.harvard.edu/dataset.xhtml?persistentId=doi:10.7910/DVN/POBVIN>.

**Funding:** This work was supported by the United States Agency for International Development (USAID) under the terms of the Cooperative Agreement for Breakthrough RESEARCH (AID-OAA-A-17-00018). The funders had no role in the study design, data collection and analysis, decision to publish, or preparation of the manuscript.

**Competing interests:** The authors have declared that no competing interests exist.

**Abbreviations:** ANC, Antenatal care; EA, Enumeration area; IPC, Interpersonal communication; OR, Odds ratio; RFSa, Resilience Food Security Activity; RISE, Resilience in the Sahel Enhanced; SBC, Social and Behavior Change; USAID, United States Agency for International Development.

## Introduction

Despite the global community's commitment outlined in the Sustainable Development Goals to end child marriage, data from 34 sub-Saharan Africa countries between 2008 and 2017 found that nearly 54% of women aged 20–24 years were married before age 18 with the most prominent countries in West Africa where several countries have a prevalence of more than 70% [1]. While evidence on the causality between child marriage and health outcomes is limited [2], several studies have found that women who experience child marriage compared to women married as adults (i.e., 18 or older) were less likely to use modern contraception [1], initiate antenatal care (ANC), or attend four or more ANC visits during pregnancy [3] and were less likely to access a skilled birth attendant or use postnatal care following delivery [4]. They were also more vulnerable to reproductive coercion, and sexual intimate partner violence [5–7]. A study conducted in Niger and Ethiopia found that marriage at age 15 or earlier was negatively associated with psychological well-being [8]. Previous studies have also found that girls who marry early are more likely to drop out of school, have lower earning potential and contribute less to household economic and health care decisions [9]. This may be because males expect obedience and adolescent girls have a lower expectation to be involved in decisions [10].

Previous studies have considered the drivers of child marriage and have identified factors at the individual, household and community levels [11–15]. Psaki et al developed a framework that describes the drivers of child marriage and proposes that social norms and attitudes as well as poverty and economic factors form part of a larger social context in which decisions about marriage are made and precede other drivers of child marriage including lack of agency, lack of opportunities (i.e., education and work) and fear of girls' sexuality and pregnancy [16]. The link between social norms and child marriage has increasingly been documented [16, 17], with a growing understanding that social norms influence communities and family members, perpetuating the practice of child marriage [18]. Social norms, broadly speaking, reflect collective practices that arise and are influenced by what other people do and by what other people think should be done [19]. According to Bicchieri et al, as opposed to customs and moral rules, social norms reflect the collective practices sustained by empirical and normative expectations around a practice and preferences conditional on these expectations (e.g., most people conforming to or believing they ought to conform to a norm). Social norms can be deconstructed as perceptions of what others within one's group does (descriptive norms), perceptions of a group's approval or disapproval of one's non-conformity (injunctive norms), and interactions between the two [19, 20]. Social norms promoting child marriage relate to feared love affairs constraining marriage prospects, discouraged pre-marital sexual activity, and a fear of poverty [21]. The prevalence of and influences on these norms, when deconstructed as descriptive and injunctive norms, can be assessed contextually using quantitative data.

The United States Agency for International Development's (USAID) Resilience in the Sahel Enhanced (RISE) II project targets chronically vulnerable populations through integrated programming to improve health behaviors and outcomes including reducing rates of child marriage in Niger [22]. Niger has one of the highest rates of child marriage, with approximately 77% of women between the ages of 20 and 49 marrying before the age of 18 and 30% marrying before the age of 15 [23]. The Niger Civil Code sets the minimum age of marriage at 18 years for boys and 15 years for girls and the majority of unions take place under customary law where there is limited enforcement or opportunities for legal action [24]. Moreover, social norms around child marriage in Niger are intertwined with broader vulnerabilities including poverty and a lack of opportunities for girls outside of marriage [16]. An adolescent girl's family plays a dominant role in determining who she marries and when. According to the 2012

Niger Demographic and Health Survey, two-thirds of all married women of reproductive age stated that their father decided who she married and approximately half said that a mother should give her daughter for marriage before the age of 18 [23]. Previous qualitative research from Niger finds that girls and their families make marital decisions within a context that elevates parental consent and community approval, and is constrained by limited economic and educational prospects, the gendered distribution of labor, and social norms that promote a narrow ‘window of opportunity’ for marriage [25]. The rise in violent extremism in the Sahel [26] further complicates the situation as conflict can amplify pre-existing drivers of child marriage particularly related to conservative norms around family honor [27]. Quantitative research from Niger reported that village level norms related to marital choice (e.g., who had the greatest say about arranging your marriage to your husband?) were associated with younger age of girls at marriage [28]. Data further suggest that among women of reproductive age, the reasons for why a mother would give her daughter for marriage below the age of 18 were primarily related to avoiding pregnancy outside of marriage (25%) and avoiding sexual promiscuity (19%) [23]. These findings suggest that there may be strong social norms related to the importance of an adolescent girl’s chastity and that families may believe premarital sex would ruin the reputation of both the daughter and parents.

The purpose of this study was to describe social norms around child marriage and how related individual, behavioral, and contextual factors influence these norms in RISE II program areas. Understanding social normative influences on child marriage can both inform RISE II community engagement programming that address social norms by sensitizing parents and community members on the risks of child marriage as well as inform other child marriage prevention and identification efforts more broadly. Drawing on the Chung and Rimal (2016) revised normative influences framework developed from a review of conceptual and empirically based social norms theories, we explored child marriage descriptive and injunctive norms and their association with behavioral, individual, and contextual attributes as precursors of behavioral intent and ultimately behavior [20]. In Fig 1, variables considered in our analysis are in dark boxes and are precursors to the ultimate outcomes of behavioral intentions (e.g., intent to marry daughter/girl before 18) and behavior (e.g., girl is married before the age of 18) reflected in the light boxes. Behavioral expectations refer to if the individual believes the behavior will result in a positive or negative outcome. Individual attributes include items such as age and past experience (e.g., experience being married under 18). Contextual attributes refer to items such as beliefs (e.g., belief that it is appropriate to get married under 18) and injunctive norms (e.g. that neighbors think one’s daughters should not engage in sexual activity before marriage) which can also be associated with descriptive norms. Unlike prior research, this study explored patterns of social norms around child marriage from both women’s and men’s perspectives, with an emphasis on norms related to fear of girls’ sexual behaviors and pregnancy.

## Materials and methods

This study drew from USAID’s Breakthrough RESEARCH integrated social and behavior change (SBC) evaluation of the RISE II program and used a cross-sectional household survey collected in April 2022 in Niger’s Maradi and Zinder regions around the midpoint of the intervention, as shown in Fig 2. The rationale for using the cross-sectional midline household survey was because it provided the most up to date measures related to child marriage social norms in the study area. Since the midline is conducted early in the implementation, we adjust for commune in the model to acknowledge programming was assigned by commune, but we are not evaluating the effectiveness of the interventions at this time. We are reporting a cross-sectional analysis of norms for respondents from these communities and adjust for potential

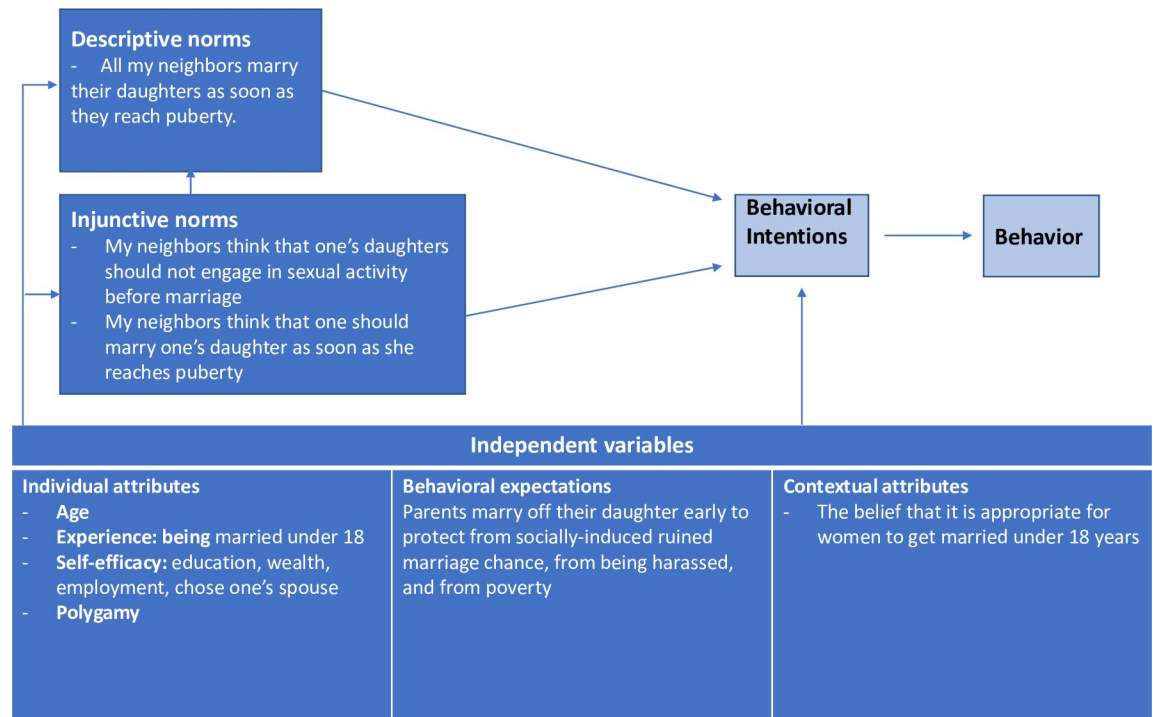

**Fig 1. Conceptual framework.**

<https://doi.org/10.1371/journal.pone.0307595.g001>

recent program exposure, however, programming was 1) not exclusively about child marriage; 2) the programming modality and intensity varied by commune; and 3) has been ongoing in the region for decades. The survey reached approximately 2,700 married women and 1,300 married men who lived in the same household.

### Study site and program

The RISE II integrated SBC program began in 2019 and was implemented at the community level through the Resilience Food Security Assistance (RFSAs) partners in the Maradi and Zinder regions of Niger. RFSAs used a variety of SBC approaches, including community engagement and interpersonal communication (IPC) through peer group activities and radio to address a range of health and development outcomes including child marriage [29]. Maradi and Zinder are densely populated, agriculturally based regions in southern Niger compared to the northern part of the country which is largely desert and nomadic and are less affected by terrorists operating on the Mali and Burkina Faso borders and northern parts of the country. The median age of marriage for women is 15 years old [23].

### Sampling

We applied a three-stage stratified sampling procedure. In the first stage, we randomly selected six intervention communes from the 18 intervention communes and six comparison communes (four in Zinder and two in Maradi region per intervention and comparison areas). In the second stage, we listed all enumeration areas (EA) identified in the 2012 General Census by commune in each of the randomly selected communes. We then used probability proportion to size to select EAs per commune starting at a random point and then systematically selecting areas using a fixed sampling interval. In total, we sampled 40 EAs for each group,

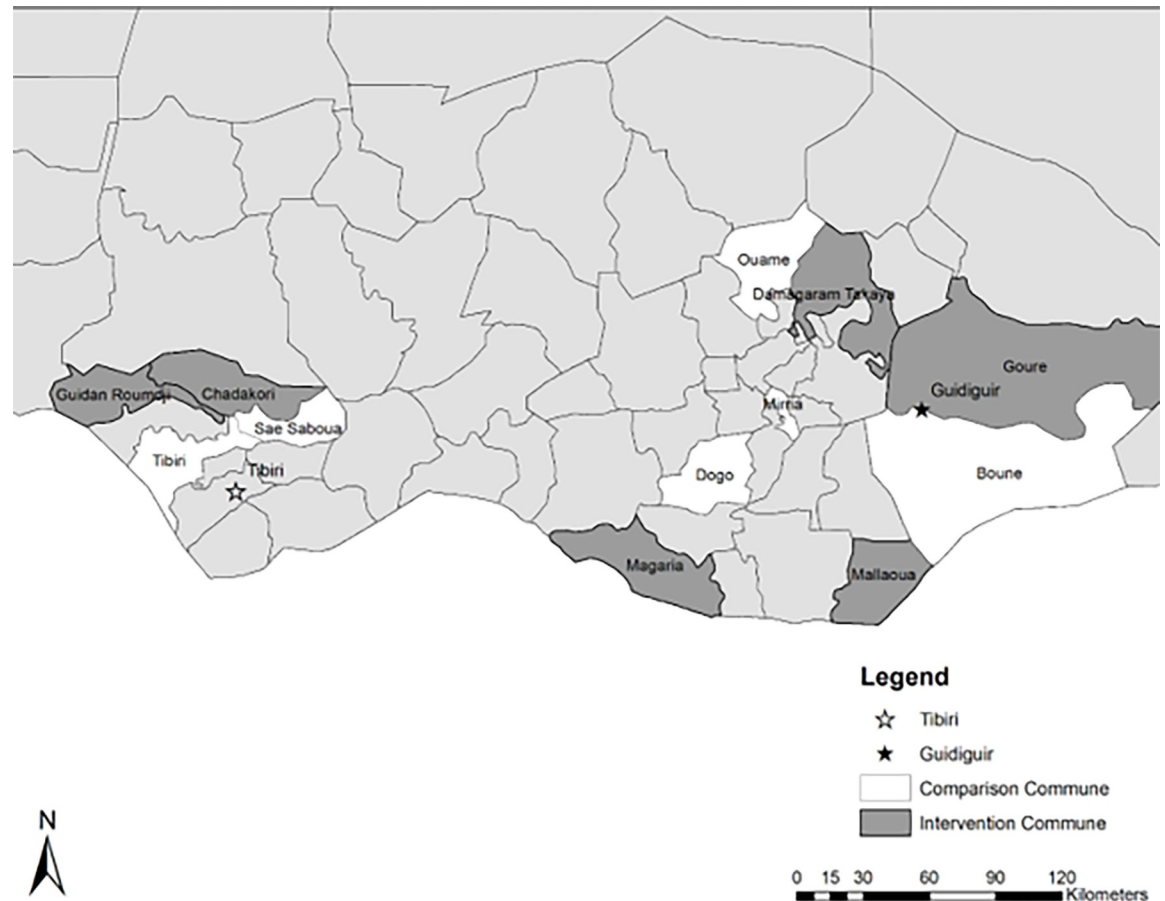

**Fig 2. Map of Niger and RISE II study areas.**

<https://doi.org/10.1371/journal.pone.0307595.g002>

stratified by commune. In the third stage, we enumerated all households in each of the randomly selected EAs with eligible women (married women between 15 and 49 years of age and married men between 15 and 59 years of age). From households with eligible study participants, we randomly selected 34 households per EA to account for a 10% non-response rate and interviewed approximately 30 eligible women and 15 eligible men. A participant was randomly chosen (by flip of a coin) if the household had more than one eligible participant. A larger sample of women was required to ensure adequate power for specific subpopulation study outcomes. We did not match husbands with females interviewed and did not register the proportion of male household members who were husbands of female respondents. Response rates were nearly 100% and we arrived at a final sample size of 2,726 women and 1,136 men for analysis. This sample size is based on a minimum detectable difference for evaluation purposes of 6–11 percentage points in the priority indicators (e.g., presence of a handwashing station at the household) between study groups, with 80% power to detect a difference and  $\alpha = 0.05$ . Background characteristics between intervention and comparison areas were overall not statistically significant different at baseline [30].

## Measures

The study draws from the RISE II integrated SBC study instruments which were designed to quantitatively assess changes in ideational factors (including social and gender norms),

Table 1. Description of variables used in analysis.

| Category                | Variable                                                                                                                                                                                                     | Construction                                                                                                                                                                                                                                                                                                    | Type                    |
|-------------------------|--------------------------------------------------------------------------------------------------------------------------------------------------------------------------------------------------------------|-----------------------------------------------------------------------------------------------------------------------------------------------------------------------------------------------------------------------------------------------------------------------------------------------------------------|-------------------------|
| Individual attribute    | Age                                                                                                                                                                                                          | Continuous item in years                                                                                                                                                                                                                                                                                        | Explanatory             |
| Individual attribute    | Married at age $\leq$ 18 years                                                                                                                                                                               | Binary variable, age at marriage $\leq$ 18 years or older (women only)                                                                                                                                                                                                                                          | Explanatory             |
| Individual attribute    | Wealth                                                                                                                                                                                                       | Categorical variable, household wealth tercile using methods from the Equity Tool [31]                                                                                                                                                                                                                          | Explanatory             |
| Individual attribute    | Education                                                                                                                                                                                                    | Binary variable, defined as no education or any formal schooling                                                                                                                                                                                                                                                | Explanatory             |
| Individual attribute    | Currently working                                                                                                                                                                                            | Binary variable, worked in the last 12 months or not                                                                                                                                                                                                                                                            | Explanatory             |
| Individual attribute    | Polygamous marriage                                                                                                                                                                                          | Binary variable, married/monogamous, or married/polygamous, based on the questions “Are you currently married, living with a man like you are married?” and “Does your (husband/partner) have other wives?”                                                                                                     | Explanatory             |
| Individual attribute    | Involvement in marriage decision                                                                                                                                                                             | Binary variable, “Chose own spouse” vs family chose                                                                                                                                                                                                                                                             | Explanatory             |
| Behavioral expectations | Summary of three variables regarding beliefs that child marriage is protective (Child marriage is defined as any formal or informal union between a child under the age of 18 and an adult or another child) | Continuous variable, summing agreement with three questions:<br>Parents marry off daughters early because they are afraid otherwise, she might have love affairs that ruin her chance of a decent marriage<br>Child marriage protects a girl from being harassed<br>Child marriage protects a girl from poverty | Explanatory             |
| Contextual attribute    | Moral rules regarding appropriateness of early marriage                                                                                                                                                      | Binary variable, created from “age it is appropriate to get married”; $\leq$ 18 years vs older (women only)                                                                                                                                                                                                     | Explanatory             |
| Descriptive norms       | “All my neighbors marry off their daughters as soon as they reach puberty”                                                                                                                                   | Binary variable, “All my neighbors marry off their daughters as soon as they reach puberty” agree or disagree/don’t know                                                                                                                                                                                        | Outcome                 |
| Injunctive norms        | “My neighbors think that one’s daughters should not engage in sexual activity before marriage”                                                                                                               | Binary variable, “My neighbors think that one’s daughters should not engage in sexual activity before marriage” agree vs disagree/don’t know                                                                                                                                                                    | Outcome/<br>Explanatory |
| Injunctive norms        | “My neighbors think that one should marry off one’s daughter as soon as she reaches puberty”                                                                                                                 | Binary variable, “My neighbors think that one should marry off one’s daughter as soon as she reaches puberty” agree vs disagree/don’t know                                                                                                                                                                      | Outcome/<br>Explanatory |

<https://doi.org/10.1371/journal.pone.0307595.t001>

attitudes, health intentions, decision making and behaviors for a range of reproductive, maternal and child health outcomes. Table 1 provides a description of variables used in the analysis.

**Outcome variables.** The three main child marriage norms outcomes explored were: 1) agreeing with the descriptive norm “all my neighbors marry off their daughters as soon as they reach puberty”; 2) agreeing with the injunctive norm “My neighbors think that one’s daughters should not engage in sexual activity before marriage”; and 3) agreeing with the injunctive norm “My neighbors think that one should marry off one’s daughter as soon as she reaches puberty”. Social norms questions were adapted from Bicchieri’s previous work focused on a social norms perspective on child marriage [19].

**Independent variables.** Individual attributes included age, whether the respondent was married at 18 years of age or less and whether they were involved in the marriage decision, wealth status, educational attainment, currently working, and whether the marriage was polygamous or monogamous. The behavioral expectations measure was constructed based on three questions as described in Table 1. Using a Cronbach alpha test, we determined that the behavioral expectation items were correlated and therefore constructed a score by summing agreement with the three questions. The contextual attribute assessed moral rules regarding appropriateness of early marriage and an injunctive norm.

## Data collection procedures

Conception-Etudes-Suivi-Evaluation-Formation (CESAF), a Niger based research firm, was responsible for data collection. CESAF recruited interviewers locally with previous experience with household surveys and trained them on the objectives of the research and obtaining written informed consent (or verbal consent if the participant was unable to write). Interviewers administered the survey in Hausa to the study participants using mobile phones through the SurveyCTO mobile data collection application. Interviews took place in-person at the participant's home in an outdoor and private location and interviews lasted approximately 30–40 minutes.

## Statistical analysis

Guided by our conceptual framework, we first conducted a descriptive analysis followed by multi-variable logistic regression models to explore the extent to which behavioral expectations, individual attributes, and contextual attributes were associated with child marriage norms. Given the similarity in variable construction between descriptive and injunctive norms, we ran correlation tests. We found that the descriptive norm, “all my neighbors marry off their daughters as soon as they reach puberty” was highly correlated with the injunctive norm “My neighbors think that one should marry off one's daughter as soon as she reaches puberty”. However, neither of these outcomes was associated with the third injunctive norm “My neighbors think that one's daughters should not engage in sexual activity before marriage”. As a result, we only included the non-correlated variable in each model. Models were run stratified by gender. The belief that it was appropriate for women to marry before the age of 18 years variable and whether the woman was married before the age of 18 was only assessed among women. We adjusted for standard errors by strata and commune to account for the sampling approach and study area. Because of the widespread vulnerabilities in the region, there are overlapping development programs operating in the RISE II study areas. As such, individuals interviewed for this study were exposed in both the intervention and comparison areas to child marriage prevention messages. At the time data were collected, we found exposure to messages varied primarily by study region than by study group as described in the RISE II midline report and therefore focused our analysis on adjusting by study area [32]. Data cleaning and analyses were completed using Stata software version 16 [33].

**Ethics.** This study was approved by the Population Council Institutional Review Board (New York, NY, USA, protocol #934) and approved locally in Niger by The Ministry of Public Health National Ethics Committee for Health Research in Niger (No. 017/2020/CNERS). The informed consent was read to the participants by a research assistant trained in ethical human subjects research. The consent form used lay language and the participants were given the opportunity to ask questions about the study before giving consent. Study participants provided informed consent by marking agreement (in the form of an X) without using their signature and were informed that they could withdraw at any point without experiencing any consequence. This procedure is prevalent in similar study settings and allows for the inclusion of illiterate individuals or those without defined signatures. Women interviewed between the ages of 15–17 were emancipated minors and therefore parental consent was not required. In addition, all methods were carried out in accordance with relevant guidelines and regulations and with the 1964 Helsinki declaration and its later amendments or comparable ethical standards.

## Results

### Background characteristics of study participants

Our samples consisted of 2,726 women and 1,136 men with approximately two-thirds living in the Zinder region as shown in Table 2. Women were younger with an average age of 32 years

Table 2. Descriptive characteristics of sample.

|                                                                                                                                                       | Women<br>N = 2,726 |                 | Men<br>N = 1,136 |                 | p-value |
|-------------------------------------------------------------------------------------------------------------------------------------------------------|--------------------|-----------------|------------------|-----------------|---------|
|                                                                                                                                                       | N                  | % (CI)          | N                | % (CI)          |         |
| Region                                                                                                                                                |                    |                 |                  |                 | 0.286   |
| Maradi                                                                                                                                                | 956                | 35% (34.0–36.0) | 411              | 36% (33.8–38.4) |         |
| Zinder                                                                                                                                                | 1776               | 65% (64.0–66.0) | 725              | 64% (61.6–66.2) |         |
| <i>Individual attributes</i>                                                                                                                          |                    |                 |                  |                 |         |
| Age (mean, SD)                                                                                                                                        | 31.7 (6.7)         |                 | 43.1 (10.5)      |                 | 0.000   |
| Wealth tercile                                                                                                                                        |                    |                 |                  |                 | 0.002   |
| Lowest                                                                                                                                                | 914                | 34% (28.2–39.2) | 347              | 31% (25.0–36.5) |         |
| Middle                                                                                                                                                | 908                | 33% (29.9–36.8) | 367              | 32% (28.3–36.6) |         |
| Highest                                                                                                                                               | 910                | 33% (27.9–39.0) | 422              | 37% (31.2–43.7) |         |
| Finished any schooling                                                                                                                                | 376                | 14% (11.7–16.5) | 213              | 19% (14.5–24.1) | 0.003   |
| Worked in last 12 months (currently working)                                                                                                          | 490                | 18% (16.1–19.7) | 884              | 78% (75.3–90.3) | 0.000   |
| Married at ≤18 years                                                                                                                                  | 2,026              | 80%             | NA               | NA              | NA      |
| Polygamous marriage                                                                                                                                   | 1,007              | 38% (33.9–39.3) | 341              | 30% (26.5–32.9) | 0.000   |
| Chose own spouse (vs. family, others)                                                                                                                 | 1,110              | 41% (38.7–42.8) | 300              | 39% (35.6–42.3) | 0.103   |
| <i>Behavioral expectations</i>                                                                                                                        |                    |                 |                  |                 |         |
| Marrying before the age of 18 protects a female from poverty + harassment + socially induced, ruined marriage prospects (composite score; values 0–3) | 1.53 (1.09)        |                 | 1.39 (1.09)      |                 | 0.000   |
| Fear that she might have love affairs and ruin her chance of a decent marriage                                                                        | 1,738              | 64% (62.0–67.0) | 788              | 70% (66.8–73.5) | 0.003   |
| Child marriage protects a girl from being harassed                                                                                                    | 1,691              | 62% (60.0–65.2) | 470              | 42% (38.5–45.6) | 0.000   |
| Child marriage protects a girl from poverty                                                                                                           | 720                | 27% (24.6–28.9) | 305              | 27% (24.6–30.2) | 0.742   |
| <i>Contextual attributes</i>                                                                                                                          |                    |                 |                  |                 |         |
| Think ≤18 is appropriate age to get married                                                                                                           | 2,264              | 83%             |                  |                 | NA      |
| My neighbors marry off their daughters as soon as they reach puberty ( <i>Descriptive norm</i> )                                                      | 1,385              | 54% (51.0–56.5) | 699              | 63% (60.1–66.4) | 0.000   |
| My neighbors think that one's daughters should not engage in sexual activity before marriage ( <i>Injunctive norm</i> )                               | 1,634              | 63% (61.0–65.1) | 851              | 77% (74.0–80.4) | 0.000   |
| My neighbors think that one should marry off one's daughter off as soon as she reaches puberty ( <i>Injunctive norm</i> )                             | 1,382              | 54% (50.6–56.7) | 695              | 63% (59.9–66.2) | 0.000   |

<https://doi.org/10.1371/journal.pone.0307595.t002>

compared to men with an average age 43 years. Less than 20% of women completed any schooling (14%) nor worked (18%), while the majority were married under the age of 18 years (80%). Many women reported being able to choose their spouse (41%), and a little over a third were in polygamous marriages (38%). Men similarly held low levels of education, though the majority (78%) were currently employed. About a third of men reported being in polygamous marriages (30%) and 39% chose their spouse.

Behavioral expectations that early marriage is protective for women were similar across women and men. However, a greater proportion of men described early marriage as protective from the fear of socially induced ruined marital prospects for women (70% vs. 64%), while women expressed its protection from being harassed (62% compared to 42%); about a quarter of men and women expressed child marriage as a means of protection from poverty (27%). The contextual belief that it is appropriate to get married under 18 years of age was 83% among women. Men reported statistically significant higher levels of agreement with the descriptive and injunctive norms compared to women (63% vs. 54%; 77% vs. 63%; 63% vs. 54%).



## Descriptive norm and injunctive norms among women

**My neighbors marry off their daughters as soon as they reach puberty (descriptive norm).** We first considered the individual attributes associated with the descriptive norm. Among women in wealthier terciles and those that reported having been married early themselves had lower odds of agreeing with the descriptive norm “All my neighbors marry off their daughters as soon as they reach puberty” (Table 3). While women who were in a polygamous marriage, chose one’s spouse, and were employed had higher odds of agreeing with this descriptive norm. Age and education were not associated with the perception of one’s neighbors marrying off their daughters as soon as they reach puberty.

Next, we considered the behavioral expectations attribute. Women who reported believing that child marriage was protective for females were significantly more likely to agree with the descriptive norm (OR = 4.84; 95% CI 4.07, 5.74).

**Table 3. Factors associated with descriptive child marriage norm and injunctive child marriage norms among women in Zinder and Maradi, Niger.**

| VARIABLES                                                                                                | My neighbors marry off their daughters as soon as they reach puberty (N = 2,259) ( <i>Descriptive Norm</i> ) | My neighbors think that one’s daughters should not engage in sexual activity before marriage (N = 2,264) ( <i>Injunctive norm</i> ) | My neighbors think that one should marry off one’s daughter as soon as she reaches puberty (N = 2,264) ( <i>Injunctive norm</i> ) |
|----------------------------------------------------------------------------------------------------------|--------------------------------------------------------------------------------------------------------------|-------------------------------------------------------------------------------------------------------------------------------------|-----------------------------------------------------------------------------------------------------------------------------------|
|                                                                                                          | Adjusted ORs                                                                                                 | Adjusted ORs                                                                                                                        | Adjusted ORs                                                                                                                      |
| <b>Individual attributes</b>                                                                             |                                                                                                              |                                                                                                                                     |                                                                                                                                   |
| Age (in years)                                                                                           | 1.00 (0.98–1.01)                                                                                             | 0.99 (0.97–1.01)                                                                                                                    | 1.00 (0.98–1.02)                                                                                                                  |
| Wealth tercile = 1, poorest (reference category (REF))                                                   | REF                                                                                                          | REF                                                                                                                                 | REF                                                                                                                               |
| Wealth tercile = 2, middle                                                                               | 0.62* (0.43–0.91)                                                                                            | 1.63** (1.24–2.15)                                                                                                                  | 0.62* (0.42–0.91)                                                                                                                 |
| Wealth tercile = 3, richest                                                                              | 0.61* (0.41–0.89)                                                                                            | 1.54** (1.21–1.95)                                                                                                                  | 0.62* (0.42–0.93)                                                                                                                 |
| Any formal schooling (vs. none)                                                                          | 0.86 (0.62–1.19)                                                                                             | 1.35* (1.02–1.79)                                                                                                                   | 0.76 (0.55–1.06)                                                                                                                  |
| Currently working (vs. not)                                                                              | 2.02** (1.49–2.73)                                                                                           | 2.19** (1.60–2.98)                                                                                                                  | 1.80** (1.34–2.42)                                                                                                                |
| <b>Polygamous marriage (vs. monogamous)</b>                                                              |                                                                                                              |                                                                                                                                     |                                                                                                                                   |
| Polygamous marriage (vs. monogamous)                                                                     | 1.35* (1.07–1.71)                                                                                            | 1.14 (0.90–1.44)                                                                                                                    | 1.33* (1.02–1.72)                                                                                                                 |
| Was married at ≤age 18 years (vs. >18 years)                                                             | 0.69* (0.53–0.92)                                                                                            | 1.38* (1.08–1.75)                                                                                                                   | 0.70* (0.53–0.92)                                                                                                                 |
| Chose own spouse (vs. family, other chose)                                                               | 3.72** (2.84–4.86)                                                                                           | 0.56** (0.45–0.70)                                                                                                                  | 4.15** (3.13–5.50)                                                                                                                |
| <b>Behavioral expectations</b>                                                                           |                                                                                                              |                                                                                                                                     |                                                                                                                                   |
| Marrying before the age of 18 protects females <sup>A</sup> (yes vs. no)                                 | 4.84** (4.07–5.74)                                                                                           | 1.50** (1.33–1.69)                                                                                                                  | 4.49** (3.77–5.34)                                                                                                                |
| <b>Contextual attributes</b>                                                                             |                                                                                                              |                                                                                                                                     |                                                                                                                                   |
| Thinks ≤18 yr is appropriate age to marry (yes vs. no)                                                   | 0.73 (0.46–1.15)                                                                                             | 0.79 (0.57–1.10)                                                                                                                    | 0.86 (0.51–1.45)                                                                                                                  |
| My neighbors think that one should marry off one’s daughter as soon as she reaches puberty (yes vs no)   | NA                                                                                                           | 3.27** (2.54–4.21)                                                                                                                  | NA                                                                                                                                |
| My neighbors think that one’s daughters should not engage in sexual activity before marriage (yes vs no) | 2.56** (2.00–3.29)                                                                                           | NA                                                                                                                                  | 3.33** (2.56–4.33)                                                                                                                |
| Constant                                                                                                 | 0.09** (0.04–0.20)                                                                                           | 0.55 (0.29–1.01)                                                                                                                    | 0.07** (0.03–0.15)                                                                                                                |

\*\* p<0.01

\* p<0.05; confidence interval in parentheses

<sup>A</sup> from poverty, harassment and socially induced, ruined marriage prospects

<https://doi.org/10.1371/journal.pone.0307595.t003>

Finally, we examined the contextual attributes. The descriptive child marriage norm was significantly associated with the injunctive norm “that one’s daughters should not engage in sexual activity before marriage” (OR = 2.56; 95% CI 2.00, 3.29).

**Engaging in sexual activity before marriage (injunctive norm).** When considering individual attributes, women who reported that they chose their spouse had lower odds of agreeing with the injunctive norm (“My neighbors think that one’s daughters should not engage in sexual activity before marriage”) (Table 3). Women in wealthier terciles, had any education, were working, or reported having been married early themselves had significantly higher odds of agreeing with the injunctive norm. Age and being in a polygamous marriage were not associated with the perception that one’s daughters should not engage in sexual activity before marriage.

The behavioral expectations attribute found that women who reported that child marriage was protective for females had an increased odds of agreeing with the injunctive norm related to premarital sex (OR = 1.50; 95% CI 1.33, 1.69).

In terms of contextual attributes, the injunctive norm related to premarital sex was also significantly associated with the other injunctive norm that one should marry off one’s daughter soon after puberty (OR = 3.27; 95% CI 2.54, 4.21).

**Marry one’s daughter as soon as she reaches puberty (injunctive norm).** We considered the individual attributes associated with the injunctive norm related to marrying one’s daughter as soon as she reaches puberty. Among women, controlling for covariates, the injunctive norm promoting early marriage soon after puberty (“My neighbors think that one should marry off one’s daughter as soon as she reaches puberty”) was negatively associated with those in wealthier terciles and those who reported having been married early themselves. Conversely, women currently employed, in a polygamous marriage, reported they chose their own spouse (OR = 4.15; 95% CI 3.13, 5.34), had higher odds of agreeing with this injunctive norm. Age and education were not associated with the perception that one should marry off their daughters soon after reaching puberty.

For behavioral expectations, women that reported that child marriage was protective for females were positively associated with the perception that one should marry off their daughters soon after reaching puberty (OR = 4.49; 95% CI 3.13, 5.50).

For contextual attributes, the injunctive norm was also positively associated with the injunctive norm disapproving pre-marital sexual activity (OR = 3.33; 95% CI 2.56, 4.33).

## Descriptive norm and injunctive norms among men

**My neighbors marry off their daughters as soon as they reach puberty (descriptive norm).** For men, we considered the individual attributes associated with the descriptive norm. Men in wealthier terciles, and who were working had significantly lower odds of agreeing with the descriptive child marriage norm (“All my neighbors marry off their daughters as soon as they reach puberty”) (Table 4). Age, education, being in a polygamous marriage, or choosing one’s spouse was not associated with the perception of ones’ neighbors marrying their daughters as soon as they reach puberty.

Regarding the behavioral expectations attribute, men who reported the belief that child marriage was protective for females (OR = 8.39; 95% CI 5.78, 12.18) had significantly higher odds of agreeing with the descriptive norm.

For the contextual attribute, the descriptive norm was associated with the injunctive norm that one’s daughters should not engage in sexual activity before marriage (OR = 9.87; 95% CI 4.36, 22.34).

**Engaging in sexual activity before marriage (injunctive norm).** When considering individual attributes among men, controlling for covariates, the injunctive norm disapproving

Table 4. Factors associated with descriptive norm and injunctive norms associations for men.

| VARIABLES                                                                                                | My neighbors marry off their daughters as soon as they reach puberty (N = 1,065) (Descriptive Norm) | My neighbors think that one's daughters should not engage in premarital sexual activity (N = 1,064) (Injunctive norm) | My neighbors think that one should marry off one's daughter as soon as she reaches puberty (N = 1,064) (Injunctive norm) |
|----------------------------------------------------------------------------------------------------------|-----------------------------------------------------------------------------------------------------|-----------------------------------------------------------------------------------------------------------------------|--------------------------------------------------------------------------------------------------------------------------|
|                                                                                                          | Adjusted ORs                                                                                        | Adjusted ORs                                                                                                          | Adjusted ORs                                                                                                             |
| <b>Individual attributes</b>                                                                             |                                                                                                     |                                                                                                                       |                                                                                                                          |
| Age (in years)                                                                                           | 0.98<br>(0.96–1.00)                                                                                 | 1.00<br>(0.98–1.02)                                                                                                   | 0.99<br>(0.96–1.01)                                                                                                      |
| Wealth tercile = 1, poorest (REF)                                                                        | REF                                                                                                 | REF                                                                                                                   | REF                                                                                                                      |
| Wealth tercile = 2, middle                                                                               | 0.55**<br>(0.36–0.86)                                                                               | 0.62<br>(0.34–1.15)                                                                                                   | 0.54**<br>(0.35–0.85)                                                                                                    |
| Wealth tercile = 3, richest                                                                              | 0.63*<br>(0.41–0.99)                                                                                | 0.27**<br>(0.13–0.57)                                                                                                 | 0.64*<br>(0.39–1.03)                                                                                                     |
| Any formal schooling (vs none)                                                                           | 1.04<br>(0.55–1.99)                                                                                 | 1.38<br>(0.75–2.52)                                                                                                   | 1.19<br>(0.59–2.41)                                                                                                      |
| Currently working (vs not working)                                                                       | 0.42*<br>(0.19–0.93)                                                                                | 5.07**<br>(2.355–10.894)                                                                                              | 0.47*<br>(0.23–0.98)                                                                                                     |
| Polygamous marriage (vs monogamous marriage)                                                             | 1.17<br>(0.68–2.02)                                                                                 | 4.43**<br>(2.01–10.89)                                                                                                | 1.15<br>(0.74–1.79)                                                                                                      |
| Chose own spouse (vs family, other chose)                                                                | 1.45<br>(0.94–2.23)                                                                                 | 0.69<br>(0.39–1.24)                                                                                                   | 1.2<br>(0.74–1.79)                                                                                                       |
| <b>Behavioral expectations</b>                                                                           |                                                                                                     |                                                                                                                       |                                                                                                                          |
| Marrying before the age of 18 protects females <sup>A</sup> (yes vs no)                                  | 8.39**<br>(5.78–12.18)                                                                              | 4.09**<br>(2.60–6.45)                                                                                                 | 8.21**<br>(5.88–11.45)                                                                                                   |
| <b>Contextual attributes</b>                                                                             |                                                                                                     |                                                                                                                       |                                                                                                                          |
| My neighbors think that one should marry one's daughter as soon as she reaches puberty (yes vs no)       | NA                                                                                                  | 9.99**<br>(5.52–18.08)                                                                                                | NA                                                                                                                       |
| My neighbors think that one's daughters should not engage in sexual activity before marriage (yes vs no) | 9.87**<br>(4.36–22.34)                                                                              | NA                                                                                                                    | 11.70**<br>(5.51–24.84)                                                                                                  |
| Constant                                                                                                 | 0.15*<br>(0.03–0.66)                                                                                | 0.17*<br>(0.049–0.57)                                                                                                 | 0.10*<br>(0.02–0.45)                                                                                                     |

\*\* p&lt;0.01

\* p&lt;0.05

confidence interval in parentheses; <sup>A</sup> from poverty, harassment and socially induced, ruined marriage prospects<https://doi.org/10.1371/journal.pone.0307595.t004>

pre-marital sexual activity (“My neighbors think that one’s daughters should not engage in sexual activity before marriage”) was negatively and significantly associated with those in the wealthiest tercile (Table 4). Men that were in a polygamous marriage, or were working, had significantly higher odds of agreeing with the injunctive norm disapproving pre-marital sexual activity. Neither age nor education were associated with the perception that one’s daughters should not engage in sexual activity before marriage.

For the behavioral expectation attribute, men who expected that child marriage was protective for females had significantly higher odds of agreeing with the injunctive norm disapproving pre-marital sexual activity (OR = 4.10; 95% CI 2.60, 6.45).

Additionally for the contextual attribute, this injunctive norm was also associated with the other injunctive norm around early marriage soon after puberty (OR = 9.99; 95% CI 5.52, 18.08).

**Marry off one's daughter as soon as she reaches puberty (injunctive norm).** We considered the individual attributes associated with the injunctive norm related to marrying one's daughter as soon as she reaches puberty. Among men, those in wealthier terciles or were working had significantly lower odds of agreeing with the injunctive norm promoting early marriage soon after puberty ("My neighbors think that one should marry off one's daughter as soon as she reaches puberty") (Table 4). Neither age, education, polygamy, nor choice of spouse were associated with the perception that one should marry off their daughters soon after reaching puberty.

For the behavioral expectations attribute, men that had the expectation that child marriage was protective for females (OR = 8.21; 95% CI 5.88, 11.45) had significantly higher odds of agreeing with the injunctive norm.

For the contextual attribute, the norm that "my neighbors think that one's daughters should not engage in sexual activity before marriage" (OR = 11.70; 95% CI 5.51, 24.84) had significantly higher odds of agreeing with the injunctive norm.

## Discussion

Understanding social norms related to child marriage and their association with individual, behavioral, and contextual attributes among men and women can provide insights that support the development of more targeted SBC interventions that seek to influence communities and family members perpetuating the practice of child marriage. In this paper, we described social norms around child marriage and how related factors influence these norms in the RISE II program areas in Niger. Unlike prior studies that centered on women's perspectives, we extended our understanding to include male viewpoints, particularly related to girls' sexual behaviors as integral in shaping the social normative environment within which child marriage occurs.

Overall, we found that male and female perspectives around social norms—including associations of individual, behavioral, and contextual attributes with descriptive and injunctive norms—demonstrated similarities and differences. Differences may be related to individual attributes (i.e., wealth). Men reported higher agreement with descriptive and injunctive norms. Both men and women reported expectations that early marriage is protective for women. Although, women described its protective influence at higher levels—and there was variation within its components (while both saw it as somewhat protective from poverty, men saw marriage as socially protective from ruining marital chances due to pre-marital sex, while women saw it as protection from harassment). Given these divergent perspectives, future research should consider exploring women's experience with harassment and how they see marriage as an opportunity for protection.

Broadly speaking for both men and women, agreement with descriptive and injunctive norms increased with behavioral attributes, particularly the expectations that early marriage protects women from physical and social harms such as ruined marriage prospects, harassment, and poverty. While agreement with the descriptive and injunctive norms around marrying one's daughter as soon as she reached puberty was negatively associated with wealthier women and women who were married before the age of 18, the injunctive norm of disapproving women's pre-marital sexual activity was positively associated with these individual attributes. Future research is needed to understand community perceptions of puberty and pre-marital sex. Interestingly, the strength of association between injunctive norms and with descriptive norms were more robust among men compared to women—suggesting that males

may be more influenced by perceptions of what their neighbors think when it came to child marriage and female sexual behavior.

Choosing one's spouse was associated with increased agreement with the descriptive and injunctive norm around 'marriage soon after puberty for women' and decreased agreement with the injunctive norm around disapproving pre-marital sex for men. Given the role that family members, particularly fathers, play in determining when a girl is married, more effort may be needed to understand intergenerational communication [11] and to increase awareness of the consequences of child marriage with adolescent girls' families and their communities [34, 35]. Previous findings from a study in Ethiopia, India, Peru, and Vietnam found that girls who reported good parent-child communication and high parent-child relationship quality were less likely to marry early [36]. However, in Niger, parents reported a lack of knowledge and skills to initiate conversations related to sexual and reproductive health and face adverse barriers to open intergenerational communication [37]. In Senegal, an approach that aimed to empower the elder community of women to improve intergenerational communication related to child marriage including advocating on their behalf resulted in adolescent girls feeling improved agency and norms were shifting to support delayed marriage [38].

While education and employment have previously been shown to be a protective factor in the prevention of child marriage [39, 40] including in Niger [41], age and education were not associated with child marriage norms for women in the adjusted models in our study. However, wealth may have a mitigating effect for men and women. Previous studies have found that interventions that aim to increase education or economic opportunities among young girls have had a positive effect in reducing the practice of child marriage [42–45]. The effectiveness of these interventions on shifting related social norms remains unclear and warrants further exploration.

## Limitations

Since the data for this study were drawn from a broader evaluation of which child marriage norms was not the primary focus, the full pathway of norms relationships with attributes to behavioral intent was not represented in the questionnaire design. The limited set of questions available for analysis also did not address gender norms as an important driver of child marriage [46, 47], future child marriage intentions and behaviors for a sister or a daughter (given our sample was mostly married) as well as details on factors influencing males' choices and attitudes related to marriage which would be useful to investigate in future studies. While we were able to assess the appropriateness of marriage before 18 years in the woman's questionnaire, the question was a bit problematic in the men's questionnaire—because men responded about their own sex instead of whether 'it is appropriate for women to get marriage under 18 years'—asking the latter may have elicited a more congruent belief with respect to girl's child marriage. The cross-sectional study design did not enable a cause-and-effect relationship to be established which would have been feasible with a longitudinal study. Finally, to address specific cultural nuances, future research should consider conducting qualitative research to identify local practices and attitudes to ensure social norm interventions reflect an understanding of the context [48]. Individual and/or collective in-depth narratives on child marriage and female sexual behaviors in Maradi and Zinder would enable us to triangulate, clarify, and reinforce our findings around women's and men's behavioral expectations and contextual attribute influences on descriptive and injunctive norms through illustrative examples.

## Conclusion

Our study found that women who were able to choose their husband and were wealthier were less likely to agree with social norms related to fear of pregnancy and sexual activity among

young girls. Furthermore, we found strong associations among men and women related to protective expectations of child marriage whereby respondents who supported harmful social norms related to fear of pregnancy and sexual activity among young girls were more likely to believe that child marriage protected from poverty, harassment and socially induced ruined marriage prospects among young girls. In addition, we found that men were more affected by injunctive normative influence, or others' perceptions of child marriage and restricting female's sexual behaviors—and may require a targeted norms intervention. Future programs should consider how to address social norms related to fear of pregnancy and sexuality among young girls when planning interventions and seek to foster an environment where communities and families engage in intergenerational communication to empower young girls and shift attitudes and subsequent norms to delay early marriage.

## Acknowledgments

We would like to thank the research team at CESAF for their data collection efforts. And, we would like to thank Sherry Hutchinson for editing the manuscript.

## Author Contributions

**Conceptualization:** Pooja Sripad.

**Data curation:** Chaibou Dadi, Leanne Dougherty.

**Formal analysis:** Jessie Pinchoff.

**Methodology:** Jessie Pinchoff.

**Project administration:** Chaibou Dadi.

**Writing – original draft:** Pooja Sripad.

**Writing – review & editing:** Pooja Sripad, Jessie Pinchoff, Chaibou Dadi, Leanne Dougherty.

## References

1. Yaya S, Odusina EK, Bishwajit G. Prevalence of child marriage and its impact on fertility outcomes in 34 sub-Saharan African countries. *BMC Int Health Hum Rights*. 2019; 19: 33. <https://doi.org/10.1186/s12914-019-0219-1> PMID: 31856810
2. Fan S, Koski A. The health consequences of child marriage: a systematic review of the evidence. *BMC Public Health*. 2022; 22: 309. <https://doi.org/10.1186/s12889-022-12707-x> PMID: 35164724
3. Adedini SA, Abatan SM, Ogunsakin AD, Alex-Ojei CA, Babalola BI, Shittu SB, et al. Comparing the timeliness and adequacy of antenatal care uptake between women who married as child brides and adult brides in 20 sub-Saharan African countries. Bayih WA, editor. *PLoS ONE*. 2022; 17: e0262688. <https://doi.org/10.1371/journal.pone.0262688> PMID: 35025949
4. Ahinkorah BO, Budu E, Seidu A-A, Bolarinwa OA, Agbaglo E, Adu C, et al. Girl child marriage and its association with maternal healthcare services utilization in sub-Saharan Africa. *BMC Health Serv Res*. 2022; 22: 777. <https://doi.org/10.1186/s12913-022-08117-9> PMID: 35698223
5. Kidman R. Child marriage and intimate partner violence: a comparative study of 34 countries. *Int J Epidemiol*. 2016; dyw225. <https://doi.org/10.1093/ije/dyw225> PMID: 27733435
6. DeLong SM, Brooks MI, Aliou S, Lundgren R, Corneliess C, Johns NE, et al. Married very young adolescent girls in Niger at greatest risk of lifetime male partner reproductive coercion and sexual violence. Dalby AR, editor. *PLoS ONE*. 2020; 15: e0231392. <https://doi.org/10.1371/journal.pone.0231392> PMID: 32282817
7. Ellsberg M. VIOLENCE AGAINST ADOLESCENT GIRLS: FALLING THROUGH THE CRACKS?
8. John NA, Edmeades J, Murithi L. Child marriage and psychological well-being in Niger and Ethiopia. *BMC Public Health*. 2019; 19: 1029. <https://doi.org/10.1186/s12889-019-7314-z> PMID: 31370825

9. Parsons J, Edmeades J, Kes A, Petroni S, Sexton M, Wodon Q. Economic Impacts of Child Marriage: A Review of the Literature. *The Review of Faith & International Affairs*. 2015; 13: 12–22. <https://doi.org/10.1080/15570274.2015.1075757>
10. Tomar S, Johns N, Challa S, Brooks MI, Aliou S, Abdoul-Moumouni N, et al. Associations of Age at Marriage With Marital Decision-Making Agency Among Adolescent Wives in Rural Niger. *Journal of Adolescent Health*. 2021; 69: S74–S80. <https://doi.org/10.1016/j.jadohealth.2021.08.007> PMID: 34809904
11. Misunas C, Erulkar A, Apicella L, Ngô T, Psaki S. What Influences Girls' Age at Marriage in Burkina Faso and Tanzania? Exploring the Contribution of Individual, Household, and Community Level Factors. *Journal of Adolescent Health*. 2021; 69: S46–S56. <https://doi.org/10.1016/j.jadohealth.2021.09.015> PMID: 34809900
12. Cislighi B, Heise L. Using social norms theory for health promotion in low-income countries. 2018; 9.
13. Melesse DY, Mutua MK, Choudhury A, Wado YD, Faye CM, Neal S, et al. Adolescent sexual and reproductive health in sub-Saharan Africa: who is left behind? *BMJ Glob Health*. 2020; 5: e002231. <https://doi.org/10.1136/bmjgh-2019-002231> PMID: 32133182
14. Naghizadeh S, Mirghafourvand M, Mohammadi A, Azizi M, Taghizadeh-Milani S, Ganbari H. Knowledge and viewpoint of adolescent girls regarding child marriage, its causes and consequences. *BMC Women's Health*. 2021; 21: 351. <https://doi.org/10.1186/s12905-021-01497-w> PMID: 34615510
15. Kok MC, van Eldik Z, Kakal T, Munthali A, Menon JA, Pires P, et al. Being dragged into adulthood? Young people's agency concerning sex, relationships and marriage in Malawi, Mozambique and Zambia. *Culture, Health & Sexuality*. 2022; 24: 767–781. <https://doi.org/10.1080/13691058.2021.1881618> PMID: 33630727
16. Psaki SR, Melnikas AJ, Haque E, Saul G, Misunas C, Patel SK, et al. What Are the Drivers of Child Marriage? A Conceptual Framework to Guide Policies and Programs. *Journal of Adolescent Health*. 2021; 69: S13–S22. <https://doi.org/10.1016/j.jadohealth.2021.09.001> PMID: 34809895
17. Kohno A, Techasrivichien T, Suguimoto SP, Dahlui M, Nik Farid ND, Nakayama T. Investigation of the key factors that influence the girls to enter into child marriage: A meta-synthesis of qualitative evidence. Jong J, editor. *PLoS ONE*. 2020; 15: e0235959. <https://doi.org/10.1371/journal.pone.0235959> PMID: 32678862
18. Malhotra A, Warner A, McGonagle A, Lee-Rife S. Solutions to End Child Marriage—What the Evidence Shows.: 36.
19. Bicchieri C, Jiang T, Lindemans JW. A Social Norms Perspective on Child Marriage: The General Framework.: 21.
20. Chung A, Rimal RN. Social norms: A review. *RCR*. 2016; 4: 1–28. <https://doi.org/10.12840/issn.2255-4165.2016.04.01.008>
21. Girls not Brides. CEFM and Sexuality Programs Working Group. Tackling the taboo: Sexuality and gender-transformative programmes to end child, early and forced marriage and unions. 2019. Available: [https://www.girlsnotbrides.org/documents/905/Tackling-the-Taboo\\_Full\\_English.pdf](https://www.girlsnotbrides.org/documents/905/Tackling-the-Taboo_Full_English.pdf)
22. USAID. Resilience in the Sahel Enhanced (RISE) II Technical Approach Working Paper. USAID; 2018. Available: [https://www.usaid.gov/sites/default/files/documents/1860/RISE\\_II\\_Technical\\_Approach\\_Working\\_Paper\\_May\\_2018\\_0.pdf](https://www.usaid.gov/sites/default/files/documents/1860/RISE_II_Technical_Approach_Working_Paper_May_2018_0.pdf)
23. Institut National de la Statistique (INS) et ICF International. Enquete Demographique de la Sante et a Indicateurs Multiples du Niger 2012. INS et ICF International; 2013.
24. Save the Children, UK. Child Marriage in Niger. 2017. Available: <https://www.savethechildren.org.uk/content/dam/global/reports/advocacy/child-marriage-niger.pdf>
25. Saul G, Diarra A, Melnikas A, Amin S. Voice Without Choice?: Investigating Adolescent Girls' Agency in Marital Decision-Making in Niger.: 18.
26. Cooke JG, Sanderson T, Johnson JC, Hubner B, CSIS Transnational Threats Project, Center for Strategic and International Studies (Washington DC), et al. Militancy and the arc of instability: violent extremism in the Sahel. 2016.
27. Hamad BA, Elamassie S, Oakley E, Alheiwidi S, Baird S. 'No One Should Be Terrified Like I Was!' Exploring Drivers and Impacts of Child Marriage in Protracted Crises Among Palestinian and Syrian Refugees. *Eur J Dev Res*. 2021; 33: 1209–1231. <https://doi.org/10.1057/s41287-021-00427-8>
28. Shakya HB, Silverman J, Barker KM, Lapsansky C, Yore J, Aliou S, et al. Associations between village-level norms on marital age and marital choice outcomes among adolescent wives in rural Niger. *SSM—Population Health*. 2020; 11: 100621. <https://doi.org/10.1016/j.ssmph.2020.100621> PMID: 32685655
29. Packard M. Report on a Review of Social and Behavior Change Methods and Approaches within Food for Peace Development Food Security Activities. Food and Nutrition Technical Assistance III Project (FANTA)/FHI 360; 2018.

30. Dougherty L. Evaluation of RISE II integrated social and behavior change activities in Niger: Baseline report.: 53.
31. Niger Equity Tool. maintained by Metrics for Management.; 2016. Available: [equitytool.org](http://equitytool.org)
32. Dougherty L, Abu Turk L, Dadi C. Evaluation of RISE II integrated social and behavior change activities in Niger: Midline tables. Washington, DC: Population Council; 2022.
33. Statacorp. Stata Statistical Software: Release 16. College Station, TX: StataCorp LLC; 2019.
34. McDougal L, Jackson EC, McClendon KA, Belayneh Y, Sinha A, Raj A. Beyond the statistic: exploring the process of early marriage decision-making using qualitative findings from Ethiopia and India. *BMC Women's Health*. 2018; 18: 144. <https://doi.org/10.1186/s12905-018-0631-z> PMID: 30143040
35. Kohno A. Why girls get married early in Sarawak, Malaysia—an exploratory qualitative study. 2020; 13.
36. Bhan G, Bhandari N, Taneja S, Mazumder S, Bahl R. The effect of maternal education on gender bias in care-seeking for common childhood illnesses. *Social Science & Medicine*. 2005; 60: 715–724. <https://doi.org/10.1016/j.socscimed.2004.06.011> PMID: 15571890
37. Silva M, Kassegne S, Nagbe RHY, Babogou J, Ezouatchi R, Abdou LA, et al. Changing the script: Inter-generational communication about sexual and reproductive health in Niamey, Niger. *Journal of Health Communication*. 2022. <https://doi.org/10.1080/10810730.2022.2160527> PMID: 36567672
38. Kohli A, Shaw B, Guntzberger M, Aubel J, Coulibaly M, Igras S. Transforming social norms to improve girl-child health and well-being: a realist evaluation of the Girls' Holistic Development program in rural Senegal. *Reprod Health*. 2021; 18: 243. <https://doi.org/10.1186/s12978-021-01295-5> PMID: 34861876
39. Bolarinwa OA, Ahinkorah BO, Okyere J, Seidu A-A, Olagunju OS. A multilevel analysis of prevalence and factors associated with female child marriage in Nigeria using the 2018 Nigeria Demographic and Health Survey data. *BMC Women's Health*. 2022; 22: 158. <https://doi.org/10.1186/s12905-022-01733-x> PMID: 35538527
40. Zegeye B, Olorunsaiye CZ, Ahinkorah BO, Ameyaw EK, Budu E, Seidu A-A, et al. Individual/Household and Community-Level Factors Associated with Child Marriage in Mali: Evidence from Demographic and Health Survey. Gigantesco A, editor. *BioMed Research International*. 2021; 2021: 1–11. <https://doi.org/10.1155/2021/5529375> PMID: 34239924
41. Shakya HB, Weeks J, Challa S, Fleming PJ, Cislighi B, McDougal L, et al. Spatial analysis of individual- and village-level sociodemographic characteristics associated with age at marriage among married adolescents in rural Niger. *BMC Public Health*. 2020; 20: 729. <https://doi.org/10.1186/s12889-020-08759-6> PMID: 32429949
42. Amin S, Saha JS, Ahmed JA. Skills-Building Programs to Reduce Child Marriage in Bangladesh: A Randomized Controlled Trial. *Journal of Adolescent Health*. 2018; 63: 293–300. <https://doi.org/10.1016/j.jadohealth.2018.05.013> PMID: 30236998
43. Erulkar AS, Muthengi E. Evaluation of Berhane Hewan: A Program to Delay Child Marriage in Rural Ethiopia. *IPSRH*. 2009; 35: 006–014. <https://doi.org/10.1363/3500609>
44. Malhotra A, Elnakib S. 20 Years of the Evidence Base on What Works to Prevent Child Marriage: A Systematic Review. *Journal of Adolescent Health*. 2021; S1054139X20306868. <https://doi.org/10.1016/j.jadohealth.2020.11.017> PMID: 33446401
45. Kalamar AM, Lee-Rife S, Hindin MJ. Interventions to Prevent Child Marriage Among Young People in Low- and Middle-Income Countries: A Systematic Review of the Published and Gray Literature. *Journal of Adolescent Health*. 2016; 59: S16–S21. <https://doi.org/10.1016/j.jadohealth.2016.06.015> PMID: 27562449
46. Cislighi B, Heise L. Gender norms and social norms: differences, similarities and why they matter in prevention science. *Sociol Health Illn*. 2020; 42: 407–422. <https://doi.org/10.1111/1467-9566.13008> PMID: 31833073
47. Greene ME, Stiefvater E. Social and gender norms and child marriage.
48. Cislighi B, Mackie G, Nkwi P, Shakya H. Social norms and child marriage in Cameroon: An application of the theory of normative spectrum. *Global Public Health*. 2019; 14: 1479–1494. <https://doi.org/10.1080/17441692.2019.1594331> PMID: 30895892
